# Supplementary figures and images for: CD8+ T-Cell Responses to Trypanosoma cruzi Are Highly Focused on Strain-Variant trans-Sialidase Epitopes
Source: PLOS journal article supplement (doi:10.1371/journal.ppat.0020077), 2006-08-01

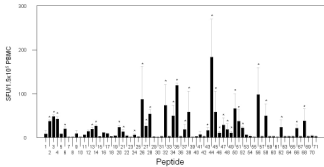

Supplement: S2 (10.1371/journal.ppat.0020077.s002) [file journal.ppat.0020077.s002]

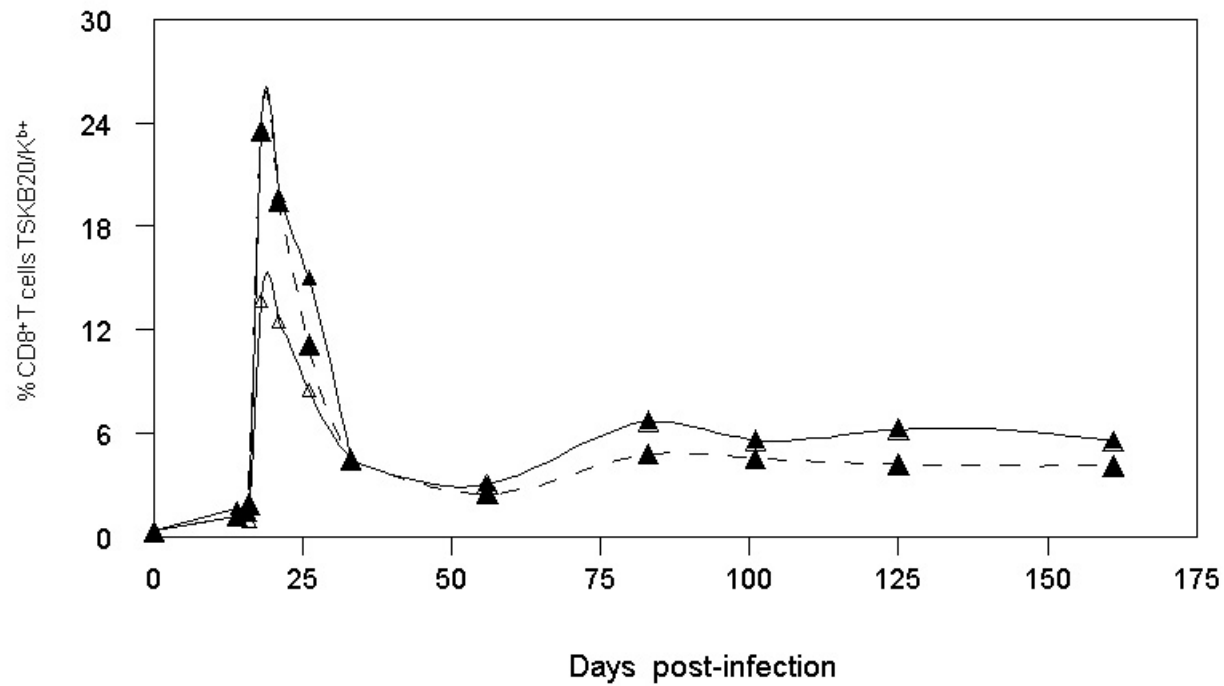

Supplement: S3 (10.1371/journal.ppat.0020077.s003) [file journal.ppat.0020077.s003]
